# Supplementary material
Source: publisher figshare collection journal article supplement (https://gsapubs.figshare.com/ndownloader/files/23298419)
Supplement: Supplementary file 1 [file 23298419]

**La-Icp-MS SESSION DETAILS**

LA-ICP-MS data collection was performed by Apatite to Zircon Inc. at the Geoanalytical Laboratory, Washington State University, Pullman, Washington, U.S.A. Individual zircon grains were targeted for data collection using a New Wave YP213 213 nm solid state laser ablation system using a 20  $\mu\text{m}$  diameter laser spot size, 5 Hz laser firing rate, and ultra high purity He as the carrier gas. Isotopic analyses of the ablated zircon material were performed using a ThermoScientific Element2 magnetic sector mass spectrometer using high purity Ar as the plasma gas. The following masses (in amu) were monitored for 0.005 s each in pulse detection mode: 202, 204, 206, 207, 208, 232, 235, and 238. At time = 0.0 s, the mass spectrometer began monitoring signal intensities; at time = 6.0 s, the laser began ablating zircon material; at time = 30.0 s, the laser was turned off and the mass spectrometer stopped monitoring signal intensities. A total of 250 data scans were collected for each zircon spot analyzed comprising: ~55 background scans; ~20 transitions scans between background and background+signal, ~175 background+signal scans. A scheme was developed to check whether mass 238 experienced a switch from pulse to analog mode during data collection and a correction procedure was employed to ensure the use of good quality intensity data for masses 235 and 238 when such a switch was observed.

**UPb DATA ANALYSIS**

Previous LA-ICP-MS studies of UPb zircon dating used the so-called intercept method, which assumes that isotopic ratio varies linearly with scan number due solely to linearly varying isotopic fractionation (Chang et al., 2006; Gehrels et al., 2008). The data modeling approach favored here was the modeling of background-corrected signal intensities for each isotope at each scan. Background intensity for each isotope was calculated using a fitted line (for decreasing background intensity) or using the arithmetic mean (for non-decreasing background intensity) at the global minimum of selected isotopes (206Pb, 232Th, and 238U) for the spot. Background+signal intensity for each isotope at each scan was calculated using the median of fitted (2nd-order polynomial) intensity values for a moving window (7 scans wide here) that includes the scan. The precision of each background-corrected signal intensity value was calculated from the precision of background intensity value and the precision of the background+signal intensity value.

Zircon UPb age standards used during analysis are summarized in Table DR1, including the  $1099 \pm 0.6$  Ma FC zircon (FC-1 of Paces and Miller, 1993) used here as the primary age standard. Isotopic data for FC were used to calculate Pb/U fractionation factors and their absolute errors for each FC data scan at each FC spot; these fractionation factors were smoothed session-wide for each data scan using the median of fitted (1st-order polynomial) fractionation factor values for a moving window (11 FC spots wide here) that includes the current FC spot and scan. Under the operating conditions of the LA-ICP-MS sessions in this study, fractionation factors were found to vary strongly with scan number, decreasing with increasing scan number (presumably due to increasing ablation pit depth and the effect this had on fractionation; e.g., Paton et al., 2010). The zircon crystal lattice is widely known to accumulate  $\alpha$ -radiation damage (e.g., Zhang et al., 2009 and references therein). It was assumed here that increased  $\alpha$ -damage in a zircon leads to a decrease in the hardness of the zircon; this in turn leads to a faster rate of laser penetration into the zircon during ablation leading to dependence of isotopic fractionation on the degree of zircon lattice radiation damage. Ages calculated for all zircon age standards, when those standards were treated as unknowns, were used to construct a fractionation factor correction curve (exponential form) in terms of accumulated radiation damage. The notion of matrix-matched zircon standard and zircon unknown has been proposed largely on the basis of trace element chemistry (e.g., Black et al., 2004). In this study, time and lattice damage, parameters invisible to instruments used to characterize trace element chemistry, were introduced and

applied based on measured U and Th chemistries to effectively matrix-match standard and unknown zircons.

Uranium decay constants and the  $^{238}\text{U}/^{235}\text{U}$  isotopic ratio reported in Steiger and Jäger (1977) were used in this study. Errors for the isotopic ratios  $^{207}\text{Pb}/^{235}\text{Uc}$  ( $^{235}\text{Uc} = 137.88238\text{U}$ ),  $^{206}\text{Pb}/^{238}\text{U}$ , and  $^{207}\text{Pb}/^{206}\text{Pb}$  at each scan included errors from the background-corrected signal values for each isotope, the fractionation factor error, and an additional relative error term required to force 95% of the FC ages to be concordant. Ages for the ratios  $^{207}\text{Pb}/^{235}\text{Uc}$ ,  $^{206}\text{Pb}/^{238}\text{U}$ , and  $^{207}\text{Pb}/^{206}\text{Pb}$  were calculated for each data scan and checked for concordance; concordance here was defined as overlap of all three ages at the 1s level (the use of 2s level was found to skew the results to include scans with any significant common Pb).

## ACKNOWLEDGMENTS

The authors wish to thank the following individuals: Jim McMillan (Apatite to Zircon, Inc.) for technical assistance regarding sample preparation; Charles Knaack (Washington State University) for technical assistance regarding LA-ICP-MS data collection; Paul O'Sullivan and Ray Donelick (Apatite to Zircon, Inc.) for assistance with LA-ICP-MS data interpretation.

## REFERENCES CITED

- Black, L.P., Kamo, S.L., Allen, C.M., Davis, D.W., Aleinikoff, J.N., Valley, J.W., Mundil, R., Campbell, I.H., Korsch, R.J., Williams, I.S., and Foudoulis, C., 2004, Improved  $^{206}\text{Pb}/^{238}\text{U}$  microprobe geochronology by the monitoring of trace-element-related matrix effect; SHRIMP, ID-TIMS, ELA-ICP-MS and oxygen isotope documentation for a series of zircon standards: *Chemical Geology*, v. 205, p. 115–140, doi:10.1016/j.chemgeo.2004.01.003.
- Chang, Z., Vervoort, J.D., McClelland, W.C., and Knaack, C., 2006. UPb dating of zircon by LA-ICP-MS: *Geochemistry, Geophysics, Geosystems*, American Geophysical Union, v. 7, no. 5, 14 p.
- Gehrels, G.E., Valencia, V.A., and Ruiz, J., 2008, Enhanced precision, accuracy, efficiency, and spatial resolution of UPb ages by laser ablation-multicollector-inductively coupled plasma-mass spectrometry: *Geochemistry Geophysics Geosystems*, American Geophysical Union, v. 9, 13 p.
- Kuiper, K.F., Deino, A., Hilgen, P.J., Krijgsman, W., Renne, P.R., and Wijbrans, J.R., 2008, Synchronizing rock clocks of Earth history: *Science*, v. 320, p. 500–504, doi:10.1126/science.1154339.
- Lanphere, M.A., and Baadsraard, H., 2001, Precise K-Ar,  $^{40}\text{Ar}/^{39}\text{Ar}$ , Rb-Sr and U-Pb mineral ages from the 27.5 Ma Fish Canyon Tuff reference standard: *Chemical Geology*, v. 175, p. 653–671, doi:10.1016/S0009-2541(00)00291-6.
- Paces, J.B., and Miller, J.D., 1993, Precise UPb ages of Duluth Complex and related mafic intrusions, northeastern Minnesota: Geochronological insights to physical, petrogenic, paleomagnetic, and tectonomagmatic processes associated with the 1.1 Ga Midcontinent Rift System: *Journal of Geophysical Research*, v. 98, no. B8, p. 13997–14013, doi:10.1029/93JB01159.
- Paton, C., Woodhead, J.D., Hellstrom, J.C., Hergt, J.M., Greig, A., and Maas, R., 2010, Improved laser ablation U-Pb zircon geochronology through robust downhole fractionation correction: *Geochemistry Geophysics Geosystems*, v. 11, Q0AA06, doi:10.1029/2009GC002618.
- [Renne, P.R., Swisher, C.C., Deino, A.L., Karner, D.B., Owens, T.L., and DePaolo, D.J., 1998, Intercalibration of standards, absolute ages and uncertainties in  $^{40}\text{Ar}/^{39}\text{Ar}$  dating: *Chemical Geology*, v.145, p. 117–152, doi:10.1016/S0009-2541(97)00159-9.

Steiger, R.H., and Jäger, E., 1977, Subcommittee on geochronology: Convention on the use of decay constants in geo- and cosmochemistry: Earth and Planetary Science Letters, v. 36, p. 359–371, doi:10.1016/0012-821X(77)90060-7.

Zhang, M., Ewing, R.C., Boatner, L.A., Salje, E.K.H., Weber, W.J., Daniel, P., Zhang, Y., and Farnan, I., 2009, Pb\* irradiation of synthetic zircon (ZrSiO<sub>4</sub>): Infrared spectroscopic study—Reply: The American Mineralogist, v. 94, p. 856–858, doi:10.2138/am.2009.542.

TABLE DR1. ZIRCON AGE STANDARDS

| Standard | Standard                              | U-Pb age ( $\pm 2\sigma$ )                  | Reference                                            |
|----------|---------------------------------------|---------------------------------------------|------------------------------------------------------|
| FC       | Duluth complex                        | 1099.0 $\pm$ 0.6 Ma                         | Paces and Miller (1993)                              |
| F5       | Duluth complex                        | 1099.0 $\pm$ 0.6 Ma (assumed equal to FC-1) | Paces and Miller (1993)                              |
| IF       | Fish Canyon Tuff                      | 28.201 $\pm$ 0.012 Ma                       | Lanphere and Baadsraard (2001); Kuiper et al. (2008) |
| MD       | Mount Dromedary                       | 99.12 $\pm$ 0.14 Ma                         | Renne et al. (1998)                                  |
| PX       | Peixe                                 | 563.5 $\pm$ 1.6 Ma                          | Gehrels et al. (2008)                                |
| R3       | Braintree complex                     | 418.9 $\pm$ 0.4 Ma                          | Black et al. (2004)                                  |
| T2       | Temora 2, Middledale gabbroic diorite | 416.78 $\pm$ 0.33 Ma                        | Black et al. (2004)                                  |
| TR       | Tardree Rhyolite                      | 61.23 $\pm$ 0.11 Ma                         | Dave Chew (personal commun.)                         |
